# Supplementary material for: Factors Associated with Caregiver Burden in Dementia: 1-Year Follow-Up Study
Source: PubMed Central journal article supplement — Psychiatry Investig. 2015 Nov 20;13(1):43–9. doi: 10.4306/pi.2016.13.1.43 (PMC4701684; doi:10.4306/pi.2016.13.1.43), 2015-11-20
Supplement: pi-13-43-s001.pdf [file pi-13-43-s001.pdf]

**Supplementary Table 1.** Item loadings for the three-factor solution of the Seoul-Activities of Daily Living

| Item number | Items                        | Factor loading |        |        |
|-------------|------------------------------|----------------|--------|--------|
|             |                              | 1              | 2      | 3      |
| 11          | Left alone                   | 0.946          | -0.210 | -0.137 |
| 8           | Dressing                     | 0.861          | -0.064 | -0.098 |
| 5           | Feeding                      | 0.753          | -0.061 | 0.017  |
| 3           | Personal hygiene             | 0.722          | 0.043  | 0.147  |
| 12          | Putting on shoes             | 0.621          | 0.202  | 0.040  |
| 10          | Bathing                      | 0.606          | 0.292  | 0.008  |
| 4           | Using the toilet             | 0.560          | 0.098  | 0.287  |
| 7           | Walking indoors              | -0.148         | 0.993  | -0.044 |
| 6           | Transfer from floor to chair | -0.075         | 0.921  | 0.085  |
| 9           | Ascend and descend stairs    | 0.112          | 0.892  | -0.118 |
| 2           | Controlling bladder          | -0.042         | -0.104 | 0.986  |
| 1           | Controlling bowels           | -0.030         | 0.031  | 0.947  |
|             | Eigenvalue                   | 5.919          | 1.603  | 1.102  |
|             | Variance (%)                 | 49.322         | 13.357 | 9.183  |

N: 110, factor 1: self-care/hygiene, factor 2: ambulation, factor 3: toileting
