# Supplementary material for: Factors Associated with Caregiver Burden in Dementia: 1-Year Follow-Up Study
Source: PubMed Central journal article supplement — Psychiatry Investig. 2015 Nov 20;13(1):43–9. doi: 10.4306/pi.2016.13.1.43 (PMC4701684; doi:10.4306/pi.2016.13.1.43), 2015-11-20
Supplement: pi-13-43-s002.pdf [file pi-13-43-s002.pdf]

**Supplementary Table 2.** Item loadings for the two-factor solution of the Seoul-Instrumental Activities of Daily Living

| Item number | Items                          | Factor loading |        |
|-------------|--------------------------------|----------------|--------|
|             |                                | 1              | 2      |
| 2           | Shopping                       | 0.955          | -0.254 |
| 6           | Walk outdoors                  | 0.830          | -0.007 |
| 4           | Household chores               | 0.788          | -0.108 |
| 9           | Grooming                       | 0.759          | 0.033  |
| 5           | Using transportation           | 0.743          | 0.023  |
| 12          | Unlock and close entrance door | 0.659          | 0.134  |
| 10          | Using household appliances     | 0.650          | 0.161  |
| 8           | Managing finance               | 0.573          | 0.237  |
| 1           | Using the telephone            | 0.555          | 0.331  |
| 15          | Leisure/Hobbies activities     | 0.433          | -0.009 |
| 3           | Preparing food/cooking         | 0.283          | 0.074  |
| 14          | Talking recent events          | -0.069         | 0.925  |
| 13          | Keeping appointment            | -0.018         | 0.879  |
| 11          | Managing belongings            | -0.116         | 0.839  |
| 7           | Taking medications             | 0.272          | 0.559  |
|             | Eigenvalue                     | 7.035          | 1.362  |
|             | Variance (%)                   | 46.898         | 9.080  |

N: 110, factor 1: non-memory-related functioning, factor 2: memory-related functioning
